# Supplementary material for: Reactive oxygen species induced by uric acid promote NRK-52E cell apoptosis through the NEK7-NLRP3 signaling pathway
Source: PubMed Central journal article supplement — Mol Med Rep. 2021 Aug 13;24(4):729. doi: 10.3892/mmr.2021.12368 (PMC8383041; doi:10.3892/mmr.2021.12368), 2021-08-13

Figure S1. Effect of UA on NRK-52E cell viability following treatment for 24 h. Viability was determined using a Cell Counting Kit-8 assay. n=3 independent samples; data represent mean  $\pm$  standard error of the mean. \*P<0.05, \*\*\*P<0.001 vs. 0  $\mu$ g/ml UA group. UA, uric acid.

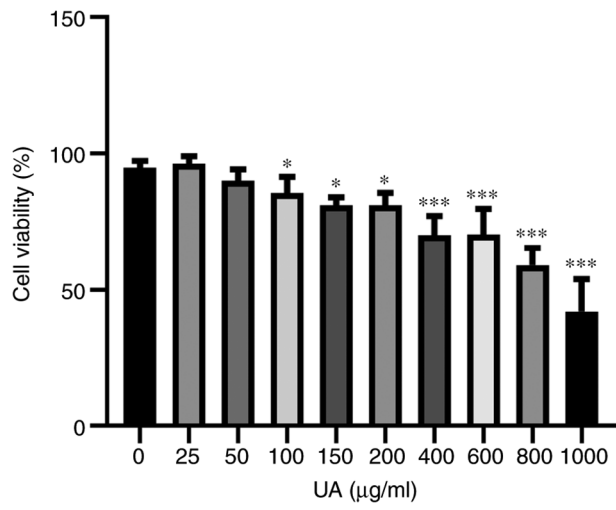

Figure S2. Effect of UA on NRK-52E cell viability following treatment for 48 h. Viability was determined using a Cell Counting Kit-8 assay. n=4 independent samples; data represent mean  $\pm$  standard error of the mean. \*\*P<0.01, \*\*\*P<0.001. UA, uric acid.

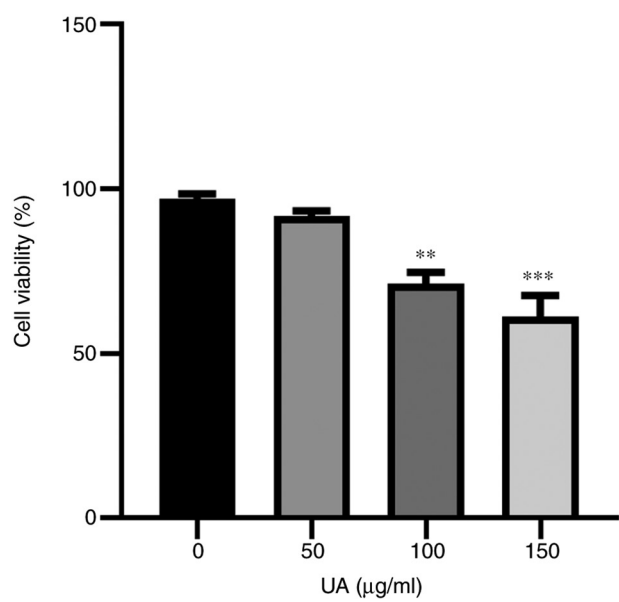

Figure S3. Effect of UA on NRK-52E cell viability following treatment for 72 h. Viability was determined using a Cell Counting Kit-8 assay. n=4 independent samples; data represent mean  $\pm$  standard error of the mean. \*\*P<0.01, \*\*\*P<0.001. UA, uric acid.

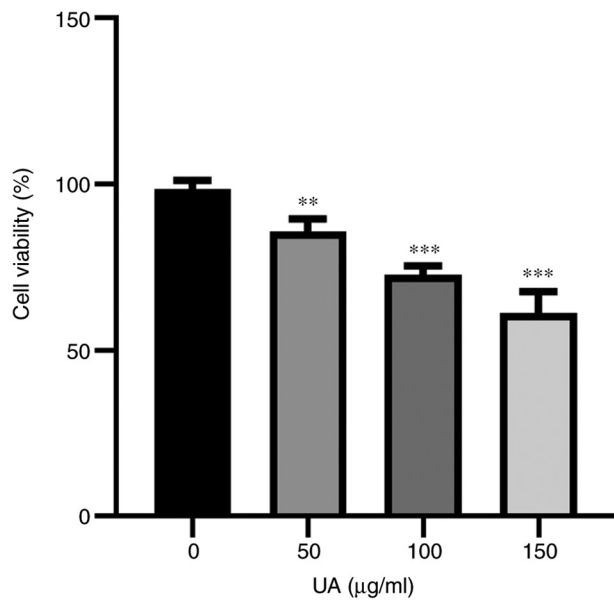

Supplement: Supplementary_Data.pdf [file Supplementary_Data.pdf]
